# Supplementary material for: Distribution and host range of viruses associated with the citrus leprosis disease complex in Mexico
Source: PeerJ. 2025 Sep 12;13:e19889. doi: 10.7717/peerj.19889 (PMC12435326; doi:10.7717/peerj.19889)
Supplement: Supplemental Information 2 — The presence or absence of leprosis virus (CILVC, CiLVC+OFV, and OFV) in individual samples collected from various orchards and host species across different states in Mexico. Each row includes the state of collection (estate), host species (species), orchard or site (orchard), sample ID (sample), and diagnostic results for three virus categories. These columns indicate whether each virus or virus combination was detected (1) or not detected (0). The data were used for statistical analyses described in the manuscript to evaluate the geographic distribution and frequency of leprosis virus infections. Sampling locations correspond to those shown in Figure 1 of the manuscript. [file peerj-13-19889-s002.xls]

## Sheet: Data Genstat
estate!	species!	orchard!	sample!	CILVC	CiLVC+OFV	OFV
Campeche	lime	CH1	1	1	0	0
Campeche	lime	CH1	2	0	1	0
Campeche	lime	CH1	3	1	1	0
Campeche	lime	CH1	4	0	1	0
Campeche	lime	CH1	5	0	0	0
Campeche	lime	CH3	6	1	0	0
Campeche	lime	CH3	7	1	0	0
Campeche	lime	CH3	8	1	0	0
Campeche	lime	CH3	9	1	0	0
Campeche	lime	CH3	10	0	0	0
Campeche	lime	CH4	11	1	0	0
Campeche	lime	CH4	12	0	0	0
Campeche	lime	CH4	13	0	0	0
Campeche	lime	CH4	14	0	0	0
Campeche	lime	CH4	15	0	0	0
Chiapas	orange	CHH4	1	0	0	0
Chiapas	orange	CHH4	2	0	0	0
Chiapas	orange	CHH4	3	0	0	0
Chiapas	orange	CHH4	4	0	0	0
Chiapas	orange	CHH5	5	0	0	1
Chiapas	orange	CHH5	6	0	0	1
Chiapas	orange	CHH2	7	1	0	0
Chiapas	orange	CHH2	8	1	0	0
Chiapas	orange	CHH2	9	1	0	0
Chiapas	orange	CHH2	10	1	0	0
Chiapas	orange	CHH2	11	0	0	0
Chiapas	orange	CHH2	12	0	0	0
Chiapas	orange	CHH2	13	0	0	0
Chiapas	orange	CHH3	14	1	0	0
Chiapas	orange	CHH3	15	1	0	0
Chiapas	orange	CHH3	16	0	0	0
Hidalgo	orange	HH1	1	0	0	1
Hidalgo	orange	HH1	2	0	0	1
Hidalgo	orange	HH1	3	0	0	0
Hidalgo	orange	HH1	4	0	0	0
Hidalgo	orange	HH1	5	0	0	0
Hidalgo	orange	HH2	6	1	0	0
Hidalgo	orange	HH2	7	0	0	0
Hidalgo	orange	HH2	8	0	0	0
Hidalgo	orange	HH2	9	0	0	0
Hidalgo	orange	HH2	10	0	0	0
Hidalgo	orange	HH3	11	1	0	0
Hidalgo	orange	HH3	12	0	0	0
Hidalgo	orange	HH3	13	0	0	0
Hidalgo	orange	HH3	14	0	0	0
Hidalgo	orange	HH4	15	0	0	0
Hidalgo	orange	HH4	16	0	0	0
Hidalgo	orange	HH4	17	0	0	1
Hidalgo	orange	HH4	18	0	0	0
Hidalgo	orange	HH5	19	0	0	1
Hidalgo	orange	HH5	20	0	0	0
Hidalgo	orange	HH5	21	0	0	0
Hidalgo	orange	HH5	22	0	0	0
Hidalgo	orange	HH5	23	0	0	0
Hidalgo	orange	HH5	24	0	0	0
Hidalgo	orange	HH5	25	0	0	0
Jalisco	lime	JH1	1	0	0	1
Jalisco	lime	JH1	2	0	0	1
Jalisco	lime	JH1	3	0	0	0
Jalisco	lime	JH1	4	0	0	0
Jalisco	lime	JH1	5	0	0	0
Jalisco	lime	JH2	6	0	0	1
Jalisco	lime	JH2	7	1	0	0
Jalisco	lime	JH2	8	0	0	0
Jalisco	lime	JH2	9	0	0	0
Jalisco	lime	JH2	10	0	0	0
Jalisco	lime	JH3	11	1	0	0
Jalisco	lime	JH3	12	1	0	0
Jalisco	lime	JH3	13	0	0	0
Jalisco	lime	JH3	14	0	0	0
Jalisco	lime	JH3	15	0	0	0
Jalisco	lime	JH4	16	0	0	1
Jalisco	lime	JH4	17	0	0	0
Jalisco	lime	JH4	18	0	0	0
Jalisco	lime	JH4	19	0	0	0
Jalisco	lime	JH4	20	0	0	0
Jalisco	lime	JH5	21	0	0	1
Jalisco	lime	JH5	22	1	0	0
Jalisco	lime	JH5	23	0	0	0
Jalisco	lime	JH5	24	0	0	0
Jalisco	lime	JH5	25	0	0	0
Morelos	lime	MH1	1	0	0	1
Morelos	lime	MH1	2	0	0	1
Morelos	lime	MH1	3	0	0	0
Morelos	lime	MH1	4	0	0	0
Morelos	lime	MH1	5	0	0	0
Morelos	lime	MH1	6	0	0	0
Morelos	lime	MH3	7	0	1	0
Morelos	lime	MH3	8	0	0	0
Morelos	lime	MH3	9	0	0	0
Morelos	lime	MH3	10	0	0	0
Morelos	lime	MH3	11	0	0	0
Morelos	lime	MH4	12	0	0	1
Morelos	lime	MH4	13	0	0	0
Morelos	lime	MH4	14	0	0	0
Morelos	lime	MH4	15	0	0	0
Morelos	lime	MH4	16	0	0	0
Morelos	lime	MH4	17	0	0	0
Morelos	lime	MH4	18	0	0	0
Morelos	lime	MH4	19	1	0	0
Nuevo Leon	orange	NLH2	1	1	0	0
Nuevo Leon	orange	NLH2	2	1	0	0
Nuevo Leon	orange	NLH2	3	1	0	0
Nuevo Leon	orange	NLH2	4	1	0	0
Nuevo Leon	orange	NLH2	5	0	0	1
Nuevo Leon	orange	NLH2	6	1	0	0
Nuevo Leon	orange	NLH4	7	1	0	0
Nuevo Leon	orange	NLH4	8	0	0	0
Nuevo Leon	orange	NLH5	9	0	0	0
Nuevo Leon	orange	NLH6	10	1	0	0
Nuevo Leon	orange	NLH6	11	1	0	0
Nuevo Leon	orange	NLH6	12	1	0	0
Nuevo Leon	orange	NLH6	13	1	0	0
Nuevo Leon	orange	NLH7	14	1	0	1
Nuevo Leon	orange	NLH7	15	1	0	0
Nuevo Leon	orange	NLH7	16	0	0	1
Oaxaca	lime	OH1	1	0	0	1
Oaxaca	lime	OH1	2	0	1	0
Oaxaca	lime	OH1	3	0	0	0
Oaxaca	lime	OH1	4	0	0	0
Oaxaca	lime	OH1	5	0	0	0
Oaxaca	lime	OH2	6	0	0	0
Oaxaca	lime	OH2	7	0	0	0
Oaxaca	lime	OH2	8	0	0	0
Oaxaca	lime	OH2	9	0	0	0
Oaxaca	lime	OH2	10	0	0	0
Oaxaca	lime	OH3	11	0	0	1
Oaxaca	lime	OH3	12	0	0	1
Oaxaca	lime	OH3	13	0	1	0
Oaxaca	lime	OH3	14	0	0	0
Oaxaca	lime	OH3	15	0	0	1
Oaxaca	lime	OH4	16	1	0	0
Oaxaca	lime	OH4	17	0	0	0
Oaxaca	lime	OH4	18	0	0	0
Oaxaca	lime	OH4	19	0	0	0
Oaxaca	lime	OH4	20	0	0	0
Puebla	lime	PH1	1	0	0	1
Puebla	lime	PH1	2	0	0	1
Puebla	lime	PH1	3	0	0	0
Puebla	lime	PH1	4	0	0	0
Puebla	lime	PH2	5	0	0	0
Puebla	lime	PH3	6	0	0	0
Puebla	lime	PH4	7	0	0	1
Puebla	lime	PH4	8	0	0	1
Puebla	lime	PH4	9	0	0	1
Puebla	lime	PH4	10	0	0	1
Puebla	lime	PH4	11	0	0	1
Queretaro	orange	QH1	1	0	0	1
Queretaro	orange	QH1	2	0	0	1
Queretaro	orange	QH1	3	0	0	1
Queretaro	orange	QH2	4	0	0	1
Queretaro	orange	QH2	5	0	0	0
Queretaro	orange	QH2	6	0	0	0
Queretaro	orange	QH3	7	0	0	0
Queretaro	orange	QH3	8	0	0	0
Queretaro	orange	QH3	9	0	0	0
Queretaro	orange	QH3	10	0	0	0
Queretaro	orange	QH3	11	0	0	0
Queretaro	orange	QH4	12	1	0	0
Queretaro	orange	QH4	13	1	0	0
Queretaro	orange	QH4	14	1	0	0
Queretaro	orange	QH4	15	0	0	0
Queretaro	orange	QH4	16	0	0	0
Queretaro	orange	QH5	17	1	0	0
Queretaro	orange	QH5	18	1	0	0
Queretaro	orange	QH5	19	1	0	0
Queretaro	orange	QH5	20	1	0	0
Queretaro	orange	QH5	21	1	0	0
Queretaro	orange	QH5	22	0	0	0
Queretaro	orange	QH5	23	0	0	0
Quintana Roo	orange	QROOH1	1	0	0	1
Quintana Roo	orange	QROOH1	2	1	0	0
Quintana Roo	orange	QROOH1	3	1	0	0
Quintana Roo	orange	QROOH1	4	0	0	0
Quintana Roo	orange	QROOH1	5	0	0	0
Quintana Roo	orange	QROOH2	6	1	0	0
Quintana Roo	orange	QROOH2	7	1	0	0
Quintana Roo	orange	QROOH2	8	1	0	0
Quintana Roo	orange	QROOH3	9	1	0	0
Quintana Roo	orange	QROOH3	10	1	0	0
Quintana Roo	orange	QROOH3	11	0	0	0
Quintana Roo	orange	QROOH3	12	0	0	0
Quintana Roo	orange	QROOH3	13	0	0	0
Quintana Roo	orange	QROOH3	14	0	0	0
Quintana Roo	orange	QROOH3	15	0	0	0
Quintana Roo	orange	QROOH3	16	0	0	0
Quintana Roo	orange	QROOH3	17	0	0	0
Quintana Roo	orange	QROOH3	18	0	0	0
Quintana Roo	orange	QROOH4	19	1	0	0
Quintana Roo	orange	QROOH4	20	1	0	0
Quintana Roo	orange	QROOH4	21	0	0	0
Quintana Roo	orange	QROOH4	22	0	0	0
Quintana Roo	orange	QROOH4	23	0	0	0
Quintana Roo	orange	QROOH5	24	0	0	0
Quintana Roo	orange	QROOH5	25	0	0	0
San Luis Potosi	orange	SLPH1	1	0	0	1
San Luis Potosi	orange	SLPH1	2	0	0	0
San Luis Potosi	orange	SLPH1	3	1	0	0
San Luis Potosi	orange	SLPH1	4	0	0	0
San Luis Potosi	orange	SLPH2	5	0	0	0
San Luis Potosi	orange	SLPH3	6	0	0	1
San Luis Potosi	orange	SLPH3	7	0	0	0
San Luis Potosi	orange	SLPH3	8	0	0	0
San Luis Potosi	orange	SLPH4	9	0	0	0
San Luis Potosi	orange	SLPH4	10	0	0	0
San Luis Potosi	orange	SLPH4	11	0	0	0
San Luis Potosi	orange	SLPH5	12	1	0	0
San Luis Potosi	orange	SLPH5	13	1	0	0
San Luis Potosi	orange	SLPH5	14	0	0	1
San Luis Potosi	orange	SLPH5	15	0	0	0
San Luis Potosi	orange	SLPH5	16	0	0	0
San Luis Potosi	orange	SLPH5	17	0	0	0
San Luis Potosi	orange	SLPH6	18	0	0	1
San Luis Potosi	orange	SLPH6	19	0	0	1
San Luis Potosi	orange	SLPH8	20	1	0	0
San Luis Potosi	orange	SLPH8	21	0	0	0
San Luis Potosi	orange	SLPH8	22	0	0	0
San Luis Potosi	orange	SLPH10	23	0	0	0
San Luis Potosi	orange	SLPH10	24	0	0	0
San Luis Potosi	orange	SLPH10	25	0	0	0
Tamaulipas	orange	TAMH1	1	0	0	0
Tamaulipas	orange	TAMH1	2	0	0	0
Tamaulipas	orange	TAMH1	3	0	0	0
Tamaulipas	orange	TAMH1	4	1	0	0
Tamaulipas	orange	TAMH1	5	1	0	0
Tamaulipas	orange	TAMH2	6	0	1	0
Tamaulipas	orange	TAMH2	7	1	1	0
Tamaulipas	orange	TAMH2	8	0	0	0
Tamaulipas	orange	TAMH2	9	0	1	0
Tamaulipas	orange	TAMH2	10	0	1	0
Tamaulipas	orange	TAMH4	11	1	0	2
Tamaulipas	orange	TAMH4	12	0	0	0
Tamaulipas	orange	TAMH4	13	0	0	0
Tamaulipas	orange	TAMH4	14	0	0	0
Tamaulipas	orange	TAMH4	15	0	0	0
Tamaulipas	orange	TAMH5	16	1	0	0
Tamaulipas	orange	TAMH5	17	1	0	0
Tamaulipas	orange	TAMH5	18	1	0	0
Tamaulipas	orange	TAMH5	19	1	0	0
Tamaulipas	orange	TAMH5	20	0	0	0
Tamaulipas	orange	TAMH6	21	0	0	0
Tamaulipas	orange	TAMH7	22	1	0	0
Tamaulipas	orange	TAMH7	23	1	0	0
Tamaulipas	orange	TAMH7	24	0	0	0
Tamaulipas	orange	TAMH8	25	0	0	0
Veracruz	orange	VH1	1	1	0	0
Veracruz	orange	VH1	2	1	0	0
Veracruz	orange	VH1	3	1	0	0
Veracruz	orange	VH1	4	0	0	0
Veracruz	orange	VH1	5	0	0	0
Veracruz	orange	VH2	6	1	0	0
Veracruz	orange	VH2	7	1	0	0
Veracruz	orange	VH2	8	1	0	0
Veracruz	orange	VH2	9	1	0	0
Veracruz	orange	VH2	10	0	0	0
Veracruz	orange	VH3	11	0	0	1
Veracruz	orange	VH3	12	0	0	0
Veracruz	orange	VH3	13	0	0	0
Veracruz	orange	VH3	14	0	0	0
Veracruz	orange	VH3	15	0	0	0
Veracruz	orange	VH4	16	0	0	1
Veracruz	orange	VH4	17	0	0	0
Veracruz	orange	VH4	18	0	0	1
Veracruz	orange	VH4	19	0	0	0
Veracruz	orange	VH4	20	0	0	0
Veracruz	orange	VH5	21	1	0	0
Veracruz	orange	VH5	22	1	0	0
Veracruz	orange	VH5	23	0	0	0
Veracruz	orange	VH5	24	0	0	0
Veracruz	orange	VH5	25	0	0	0
Zacatecas	lime	ZH1	1	0	0	1
Zacatecas	lime	ZH1	2	0	0	0
Zacatecas	lime	ZH1	3	0	0	0
Zacatecas	lime	ZH1	4	0	0	0
Zacatecas	lime	ZH1	5	0	0	1
Zacatecas	lime	ZH3	6	0	0	1
Zacatecas	lime	ZH3	7	0	0	0
Zacatecas	lime	ZH3	8	0	0	0
Zacatecas	lime	ZH3	9	0	0	0
Zacatecas	lime	ZH3	10	0	0	0
Zacatecas	lime	ZH5	11	0	0	1
Zacatecas	lime	ZH5	12	0	0	0
Zacatecas	lime	ZH5	13	0	0	0
Zacatecas	lime	ZH5	14	0	1	0
Zacatecas	lime	ZH5	15	0	0	1
